# Supplementary material for: Patients with colorectal cancer have identical strains of Fusobacterium nucleatum in their colorectal cancer and oral cavity
Source: PubMed Central journal article supplement — Gut. 2018 Jun 22;68(7):1335–7. doi: 10.1136/gutjnl-2018-316661 (PMC6582823; doi:10.1136/gutjnl-2018-316661), 2018-06-22
Supplement: gutjnl-2018-316661supp001.pdf [file gutjnl-2018-316661supp001.pdf]

**Supplementary Table 1. Patients' clinicopathological characteristics.**

| Patient | Age | Sex | Pathology | Size(mm) | Location | Stage                 |
|---------|-----|-----|-----------|----------|----------|-----------------------|
| A       | 82  | M   | tub1      | 15       | R        | T1bN0M0<br>Stage I    |
| B       | 64  | M   | tub2      | 40       | R        | T3N1bM0<br>Stage IIIb |
| C       | 66  | M   | tub2      | 30       | S        | T2N0M0<br>Stage I     |
| D       | 54  | M   | tub1      | 30       | S        | T1bN0M0<br>Stage I    |
| E       | 76  | M   | tub2+por  | 30       | A        | T3N0M1<br>Stage IV    |
| F       | 88  | F   | tub2      | 30       | R        | T3N0M0<br>Stage II    |
| G       | 67  | F   | tub2+muc  | 30       | R        | T3N2M0<br>Stage IIIb  |
| H       | 57  | M   | tub2      | 40       | S        | T4aN0M0<br>Stage II   |
| I       | 66  | F   | tub2      | 30       | A        | T1bN0M0<br>Stage I    |
| J       | 81  | M   | tub2      | 60       | A        | TisN0M0<br>Stage 0    |
| K       | 71  | M   | tub2      | 80       | A        | T4aN1M0<br>Stage IIIa |
| L       | 68  | M   | tub2      | 30       | S        | T3N0M0<br>Stage II    |
| M       | 67  | M   | tub1      | 30       | A        | T4N3M1<br>Stage IV    |
| N       | 65  | F   | tub1      | 20       | A        | T4N2M1<br>Stage IV    |

tub1, well differentiated tubular adenocarcinoma; tub2, moderately differentiated tubular adenocarcinoma; por, poorly differentiated adenocarcinoma; muc, mucinous adenocarcinoma

A, ascending colon; T, transverse colon; S, sigmoid colon; R, rectum
